# Supplementary material for: Effects of spermine on liver barrier function, amino acid transporters, immune status, and apoptosis in piglets
Source: Royal Society of Chemistry journal article supplement (doi:10.1039/c8ra05421e), 2019-01-01
Supplement: c8ra05421e1.pdf [file c8ra05421e1.pdf]

## Supplementary material

### Effects of spermine on liver barrier function, amino acid transporters, immune status, and apoptosis in piglets

Gangmang Liu,<sup>\*a,b</sup> Jie Zheng,<sup>a,b</sup> Wei Cao,<sup>a,b</sup> Xianjian Wu,<sup>a,b</sup> Gang Jia,<sup>a,b</sup> Hua Zhao,<sup>a,b</sup>

Xiaoling Chen,<sup>a,b</sup> Caimei Wu,<sup>a,b</sup> and Jing Wang<sup>c</sup>

<sup>a</sup>Institute of Animal Nutrition, Sichuan Agricultural University, Chengdu 611130, Sichuan, China

<sup>b</sup>Key Laboratory for Animal Disease-Resistance Nutrition of China Ministry of Education, Chengdu 611130, Sichuan, China

<sup>c</sup>Maize Research Institute, Sichuan Agricultural University, Chengdu 611130, Sichuan, China

**Table S1** Average proportion of ingredients and nutrients levels of the basal formula milk powder (on 87.5% dry matter basis)

|                                              | Contents |
|----------------------------------------------|----------|
| Ingredients (%)                              |          |
| Whole-milk powder (24% crude protein)        | 58.00    |
| Whey protein concentrate (34% crude protein) | 25.00    |
| Casein                                       | 5.70     |

---

|                                  |        |
|----------------------------------|--------|
| Coconut oil                      | 10.00  |
| CaH <sub>2</sub> PO <sub>4</sub> | 0.10   |
| Choline chloride (50% purity)    | 0.10   |
| Vitamin premix*                  | 0.10   |
| Mineral premix <sup>#</sup>      | 0.50   |
| L-arginine (98.5% purity)        | 0.06   |
| DL-methionine (98.5% purity)     | 0.06   |
| L-lysine · HCl (78.5% purity)    | 0.30   |
| L-threonine (98% purity)         | 0.03   |
| L-tryptophan (98% purity)        | 0.05   |
| Total                            | 100.00 |
| Nutrients                        |        |
| Digestible energy (MJ/kg)        | 18.4   |
| Crude protein (%)                | 25.3   |
| Calcium (%)                      | 1.02   |
| Total phosphorus (%)             | 0.81   |
| Available phosphorus (%)         | 0.67   |
| Digestible lysine (%)            | 1.93   |
| Digestible methionine (%)        | 0.63   |
| Digestible arginine (%)          | 0.86   |

---

\*Vitamin premix provided per kg formula powder: vitamin A, 0.94 mg; vitamin D3,

0.01 mg; vitamin E, 20 mg; vitamin K3, 1 mg; vitamin B12, 0.04 mg; riboflavin, 5 mg; niacin, 20 mg; pantothenic acid, 15 mg; folic acid, 1.5 mg; thiamin, 1.5 mg; pyridoxine, 2 mg; biotin, 0.1 mg.

#Mineral premix provided per kg formula powder: Zn, 90 mg; Mn, 4.0 mg; Fe, 90 mg; Cu, 6.0 mg; I, 0.2 mg; Se, 0.3 mg.

**Table S2** Primer sequences of the target and reference genes were used in Real-time PCR.

| Genes          | Primer sequence (5'-3')                                             | Product<br>(bp) | Annealing<br>temperature (°C) | Accession no.  |
|----------------|---------------------------------------------------------------------|-----------------|-------------------------------|----------------|
| $\beta$ -Actin | Forward: TGCGGGACATCAAGGAGAA<br>Reverse: GCCATCTCCTGCTCGAAGTC       | 58              | 58                            | DQ452569.1     |
| ZO1            | Forward: CCCAACCTCACAAATAGAAAGTGA<br>Reverse: GCGAATAATGCCAGAGCTACG | 70              | 58                            | XM_013993251.1 |
| ZO2            | Forward: CGGGTGGTCATGGTTAACG<br>Reverse: TGAACGGCAAAGGAATGGA        | 59              | 58                            | NM_001206404.1 |
| Occludin       | Forward: CCTCAGGCAGCCTCATTACAG<br>Reverse: GGGAGCCCGTTTTGAAGAC      | 61              | 58                            | NM_001163647.2 |
| Claudin-1      | Forward: GCTCCTGCCCCCGAAA<br>Reverse: CCTTGCAGTGGGCAGGAA            | 63              | 58                            | NM_001244539.1 |
| Claudin-2      | Forward: TCCTCCCTGTTCTCCCTGATAG<br>Reverse: CCTTGCAGTGGGCAGGAA      | 59              | 58                            | NM_001161638.1 |

|            |                                   |    |    |                |
|------------|-----------------------------------|----|----|----------------|
| Claudin-3  | Forward: TGGGAGGGCCTGTGGAT        | 64 | 58 | NM_001160075.1 |
|            | Reverse: CGTACACTTTGCACTGCATCTG   |    |    |                |
| Claudin-12 | Forward: GGGCTGTCTGGGATGTTCA      | 57 | 58 | NM_001160079.1 |
|            | Reverse: GAGGCGATTCCACACAGGAA     |    |    |                |
| Claudin-14 | Forward: GAAATAAATGCACCCGGATAATCT | 92 | 58 | NM_001161642.1 |
|            | Reverse: CCGCGGGAGTCCTAATGA       |    |    |                |
| Claudin-15 | Forward: TGCACGGGAACGTCATCA       | 63 | 58 | NM_001161643.1 |
|            | Reverse: CGGTGGCGCAGCTGTAC        |    |    |                |
| Claudin-16 | Forward: TCCTGTTGGCTTGGAATGG      | 57 | 58 | FJ873105.1     |
|            | Reverse: GAGGACAGCACCAGCCAAA      |    |    |                |
| MLCK       | Forward: AAGGCCAACATCGTCATGGT     | 66 | 58 | XM_021070241.1 |
|            | Reverse: GTC AATGATGCGCTCGAACA    |    |    |                |
| SLC1A1     | Forward: TTCTTTGTTCCCCACATCTTTCTT | 68 | 58 | NM_00116464    |
|            | Reverse: CCCTTCCCACACTCGACTGA     |    |    |                |
| SLC1A5     | Forward: CCCGGACCTAGCCTCTTGA      | 57 | 58 | XM_003127238.4 |
|            | Reverse: GGTCCTTGGCTCCGAAAAG      |    |    |                |

|               |                                                                      |    |    |                |
|---------------|----------------------------------------------------------------------|----|----|----------------|
| SLC7A1        | Forward: CATCTTTGCCGTGATCATAATTCT<br>Reverse: TTTGTTGACCATGGCTGACTCT | 79 | 58 | NM_001012613.1 |
| SLC7A7        | Forward: TTTGGTTCCCAAGGTTGCA<br>Reverse: GCAGCTTCCTGGCATTGC          | 58 | 58 | NM_00111042    |
| SLC7A9        | Forward: TTGCCATCATCTGTCTCAGCTT<br>Reverse: GCTGCAGCCTGCGTAGAAG      | 62 | 58 | EF127857.1     |
| SLC5A1        | Forward: TGGCCTGAGACCCTCCTTCT<br>Reverse: CATCAATCAAGACACCTCAAAAAA   | 71 | 58 | NM_00116402    |
| SLC6A19       | Forward: GCAACGTGACGCAGGAGAA<br>Reverse: GGTCGGAGGCGTTGCA            | 57 | 58 | XM_003359855.3 |
| SLC15A1       | Forward: ACTGCAAGCAACGACCATGA<br>Reverse: CATCTGATCCGGCTGGATTT       | 61 | 58 | NM_214347.1    |
| TNF- $\alpha$ | Forward: CGACTCAGTGCCGAGATCAA<br>Reverse: GACCTGCCCAGATTCAGCAA       | 60 | 58 | JF831365.1     |
| IL-1 $\beta$  | Forward: AAGGCCGCCAAGATATAACTGA<br>Reverse: GCCCTCTGGGTATGGCTTTC     | 71 | 58 | NM_001302388.1 |

|                |                                                                           |    |    |             |
|----------------|---------------------------------------------------------------------------|----|----|-------------|
| IL-2           | Forward: GCCATTGCTGCTGGATTTACA<br>Reverse: TGGAGAGATCAGCATTCTCGTAATT      | 68 | 58 | FJ543109.1  |
| IL-6           | Forward: ATGCTTCCAATCTGGGTTCAA<br>Reverse: CACAAGACCGGTGGTGATTCT          | 61 | 58 | AF518322.1  |
| IL-8           | Forward: ACATCCATGAGGAAGACAGTTTGA<br>Reverse: CGGGA ACTCCACGCTAGATTC      | 70 | 58 | AB057440.1  |
| IL-10          | Forward: CCACATGCTCCGGGAACT<br>Reverse: TCCTTCGTTTGAAAGAACTCTTCA          | 63 | 58 | HQ236499.1  |
| IL-12          | Forward: GCCCAGGAATGTTCAAATGC<br>Reverse: TGTTGCTGACGGCCTTCAG             | 60 | 58 | NM_213993.1 |
| IgM            | Forward: TCTGGCAAACACAGCTCATAACA<br>Reverse: TCGTTGCATCTGCCATTACTG        | 69 | 58 | AB699686.1  |
| TGF- $\beta$ 1 | Forward: CGAGCCAGAGGCGGACTAC<br>Reverse: TTGCCGCTTCCACCATTA               | 63 | 58 | NM_214015.1 |
| IFN- $\gamma$  | Forward: CCATTGCCTACAGTAACTCGTTTG<br>Reverse: TCCAGGTTCTCTACCACTTCTATCACT | 77 | 58 | HQ026021.1  |

|                    |                                    |    |    |                |
|--------------------|------------------------------------|----|----|----------------|
| CD8                | Forward: GACCTCCGGCATCCTTCTC       | 54 | 58 | AB634502.1     |
|                    | Reverse: CGGCGGTGGCAGATGA          |    |    |                |
| LFA-1              | Forward: CCGGATGTTCTGCTGAATAATG    | 64 | 58 | NM_001044608.1 |
|                    | Reverse: CGATGGCACCAAAGGTGTT       |    |    |                |
| CD18               | Forward: AAAGTGGCCGAAAGCAACAT      | 64 | 58 | U13941.1       |
|                    | Reverse: CACATGTTTTCACCATTTTCTTGGT |    |    |                |
| iNOS               | Forward: CAGCGGGATGACTTTCCAA       | 60 | 58 | NM_001143690.1 |
|                    | Reverse: TTGCAAGCAAGATCCCCTTT      |    |    |                |
| Hepcidin           | Forward: CGGCTGCTGTCGCAAAG         | 57 | 58 | AF516143.1     |
|                    | Reverse: GGTGGGCAGCTCTACGTCTT      |    |    |                |
| LEAP2              | Forward: CATCCCCCCTCAATCAAG        | 59 | 58 | AF516144.1     |
|                    | Reverse: GGCAGATGACGAGTACTGCAAA    |    |    |                |
| $\beta$ -defensin1 | Forward: GCTTAAGGAATAAAGGCGTGTGTAT | 62 | 58 | NM_213838.1    |
|                    | Reverse: GCCGATCTGTTTCATCTTTGG     |    |    |                |
| STAT2              | Forward: TGCCTCAAACCTCCACATCGA     | 65 | 58 | AB004061.1     |
|                    | Reverse: CCTTGTTTCGGACAGTGAAGTTG   |    |    |                |



|           |                                  |     |    |                |
|-----------|----------------------------------|-----|----|----------------|
| STAT3     | Forward: AGCCTCTCCGCAGAGTTCAA    | 60  | 58 | NM_001044580.1 |
|           | Reverse: GCCCCCGTTCCCACAT        |     |    |                |
| JAK2      | Forward: CCCAAAGCCAAAAGATAAGTCAA | 76  | 58 | AB00601        |
|           | Reverse: TGTTGGTGAGGTTGGCACAT    |     |    |                |
| NF-κB P65 | Forward: CGAGAGGAGCACGGATACCA    | 60  | 58 | EU399817.1     |
|           | Reverse: CCCGTGTAGCCATTGATCTTG   |     |    |                |
| mTOR      | Forward: CAGGCATACGGTCGAGACTTAA  | 116 | 58 | XM_013998977.1 |
|           | Reverse: CGCCTGAACACGTGGTAATAGA  |     |    |                |
| S6K1      | Forward: CCCTGCACTCGGTGGTACA     | 63  | 58 | NM_001243214.1 |
|           | Reverse: CCACGTAGCCATCACTAAAAACC |     |    |                |
| 4EBP1     | Forward: GGCGGGCGGTGAAGAG        | 58  | 58 | NM_001244225.1 |
|           | Reverse: GATCCCATGGCTGGTCCTTT    |     |    |                |
| Bax       | Forward: GCCTCAGTGTTCTTGTCTTTGGT | 59  | 58 | AM233489.1     |
|           | Reverse: TCGGGCAACGTGTGGAA       |     |    |                |
| Bcl-2     | Forward: CCAGCATGCGGCCTCTAT      | 57  | 58 | AB271960.1     |
|           | Reverse: GACTGAGCAGCGCCTTCAG     |     |    |                |

|           |                                 |    |    |             |
|-----------|---------------------------------|----|----|-------------|
| Caspase-3 | Forward: CCGGAATGGCATGTCGAT     | 60 | 58 | NM_214131.1 |
|           | Reverse: TGAAGGTCTCCCTGAGATTTGC |    |    |             |

---

ZO-(1,2) zonula occludens (1,2); MLCK, myosin light chain kinase; SLC (7A1, 7A7, 7A9, 5A1, 6A19, 15A1), amino acid transport related factor (7A1, 7A7, 7A9, 5A1, 6A19, 15A1); TNF- $\alpha$ , tumor necrosis factor  $\alpha$ ; IL-(1 $\beta$ , 2, 6, 8, 10, 12), interleukin (1 $\beta$ , 2, 6, 8, 10, 12); IgM, immunoglobulin M; TGF- $\beta$ 1, transforming growth factor  $\beta$ 1; IFN- $\gamma$ , interferon  $\gamma$ ; CD8, cluster of differentiation 8; LFA-1, lymphocyte function-associated antigen 1; CD18, integrin beta-2; iNOS, inducible nitric oxide synthase; LEAP2, liver-expressed antimicrobial peptide 2; STAT2, signal transducer and activator of transcription 2; STAT3, signal transducer and activator of transcription 3; JAK2, Janus kinase 2; NF- $\kappa$ B P65, nuclear factor-kappa B P65; S6K1, ribosomal protein S6 kinase 1; 4EBP1, eukaryotic IF4E-binding protein 1; mTOR, mammalian target of rapamycin; Bax and Bcl-2, apoptosis related factor; Caspase-3, cysteine-aspartic acid protease factor 3; JNK, c-Jun N-terminal kinases.
